# Supplementary material for: Biochemical Characterization and Effects of Cooking Methods on Main Phytochemicals of Red and Purple Potato Tubers, a Natural Functional Food
Source: MDPI journal article supplement (doi:10.3390/foods11030384), 2022-01-28
Supplement: s1 [file s1]

**Table S1.** Tuber characteristics of the potato genotype tested in the experimental field. For each genotype, the name, origin, tuber skin color (TSC), tuber flesh color (TFC), tuber shape (TS), eye and stolon characteristics are reported.

| Genotype               | TSC            | TFC    | TS                  |
|------------------------|----------------|--------|---------------------|
| Musica                 | Yellow         | Yellow | Oblong              |
| Scano di<br>Montiferro | Dark<br>violet | Violet | Oblong<br>irregular |
| Violet<br>Queen        | Dark<br>violet | Violet | Oblong              |
| Magenta<br>Love        | Red            | Pink   | Oblong              |

**Table S2.** Anthocyanin profile in raw and cooked potatoes expressed as mg kg<sup>-1</sup> of DM. Values are means  $\pm$  SD (n = 3). Statistical analyses were made by comparing anthocyanin content across varieties. Means denoted by the same letter did not differ significantly at  $P \leq 0.05$  according to Tukey's multiple range test.

| Variety      |                           | Petunidin 3-O-rutinoside | Petunidin 3-O-caffeoyl-rutinoside-5-O-glucoside | Petunidin 3-O-p-coumaroyl-rutinoside 5-O-glucoside | Petunidin 3-O-feruloyl-rutinoside 5-O-glucoside | Malvidin 3-O-p-coumaroyl-rutinoside-5-O-glucoside | Malvidin 3-O-p-feruloyl-rutinoside-5-O-glucoside |
|--------------|---------------------------|--------------------------|-------------------------------------------------|----------------------------------------------------|-------------------------------------------------|---------------------------------------------------|--------------------------------------------------|
| Violet Queen | Fresh non-peeled          | 19.4 $\pm$ 2.0 (b)       | 27.4 $\pm$ 1.3 (c)                              | 360.9 $\pm$ 13.0 (b)                               | 17.0 $\pm$ 0.8 (c)                              | 98.7 $\pm$ 3.2 (b)                                | 12.8 $\pm$ 0.9 (a)                               |
|              | Fresh peeled              | 17.6 $\pm$ 1.0 (b)       | 60.5 $\pm$ 2.9 (c)                              | 912.5 $\pm$ 33.9 (b)                               | 31.7 $\pm$ 0.4 (c)                              | 177.0 $\pm$ 3.8 (b)                               | 22.3 $\pm$ 1.6 (b)                               |
|              | Boiled peeled             | 28.2 $\pm$ 1.1 (b)       | 183.9 $\pm$ 10.7 (b)                            | 3598.7 $\pm$ 67.5 (c)                              | 75.0 $\pm$ 3.8 (c)                              | 323.8 $\pm$ 13.5 (b)                              | 27.5 $\pm$ 1.3 (b)                               |
|              | Microwaved non-peeled cut | 47.8 $\pm$ 2.3 (b)       | 216.2 $\pm$ 11.9 (b)                            | 2752.7 $\pm$ 46.9 (b)                              | 43.6 $\pm$ 2.0 (b)                              | 283.0 $\pm$ 11.8 (b)                              | 15.9 $\pm$ 1.0 (a)                               |
|              | Baked non-peeled cut      | 19.0 $\pm$ 1.5 (b)       | 166.6 $\pm$ 9.8 (b)                             | 625.4 $\pm$ 21.9 (c)                               | 20.6 $\pm$ 1.0 (c)                              | 98.4 $\pm$ 4.6 (b)                                | 10.5 $\pm$ 0.5 (b)                               |
|              | Fried                     | 14.0 $\pm$ 0.9 (b)       | 75.0 $\pm$ 3.0 (b)                              | 528.7 $\pm$ 14.7 (c)                               | 15.2 $\pm$ 0.9 (c)                              | 72.2 $\pm$ 3.6 (b)                                | 8.2 $\pm$ 0.8 (b)                                |
| Blue star    | Fresh non-peeled          | < 0.5 (a)                | 11.3 $\pm$ 0.8 (a)                              | 24.8 $\pm$ 1.3 (a)                                 | 11.4 $\pm$ 0.7 (b)                              | 15.5 $\pm$ 0.7 (a)                                | 11.5 $\pm$ 1.0 (a)                               |
|              | Fresh peeled              | < 0.5 (a)                | 15.4 $\pm$ 0.8 (a)                              | 32.9 $\pm$ 1.8 (a)                                 | 8.9 $\pm$ 0.3 (b)                               | 11.5 $\pm$ 0.9 (a)                                | 8.9 $\pm$ 0.6 (a)                                |

|                     |                           |                 |                |                  |                |                  |                 |
|---------------------|---------------------------|-----------------|----------------|------------------|----------------|------------------|-----------------|
|                     | Boiled peeled             | < 0.5 (a)       | 10.8 ± 0.6 (a) | 23.4 ± 1.0 (a)   | 10.6 ± 0.4 (b) | 11.9 ± 0.6 (a)   | 9.1 ± 0.9 (a)   |
|                     | Microwaved non-peeled cut | < 0.5 (a)       | 51.9 ± 3.0 (a) | 308.4 ± 13.0 (a) | 70.1 ± 2.1 (c) | 47.2 ± 2.1 (a)   | 28.5 ± 1.1 (b)  |
|                     | Baked non-peeled cut      | < 0.5 (a)       | 25.6 ± 1.1 (a) | 71.7 ± 3.0 (a)   | 13.9 ± 0.5 (b) | 12.2 ± 0.8 (a)   | 8.0 ± 0.3 (a)   |
|                     | Fried                     | < 0.5 (a)       | 12.9 ± 0.8 (a) | 41.7 ± 2.1 (a)   | 10.3 ± 0.7 (b) | 10.3 ± 0.5 (a)   | 6.5 ± 0.2 (a)   |
| Scano di Montiferro | Fresh non-peeled          | 31.3 ± 1.8 (c)  | 16.2 ± 1.0 (b) | 13.3 ± 1.0 a     | - (a)          | 350.1 ± 15.5 (c) | 29.5 ± 1.9 (b)  |
|                     | Fresh peeled              | 36.7 ± 2.0 (c)  | 21.9 ± 1.1 (b) | 42.3 ± 1.4 a     | - (a)          | 443.1 ± 17.3 (c) | 34.8 ± 1.9 (c)  |
|                     | Boiled peeled             | 45.5 ± 2.8 (c)  | 16.8 ± 1.0 (a) | 172.2 ± 6.4 b    | - (a)          | 690.1 ± 22.9 (c) | 66.2 ± 3.6 (c)  |
|                     | Microwaved non-peeled cut | 104.4 ± 4.9 (c) | 53.8 ± 3.9 (a) | 284.2 ± 11.7 a   | - (a)          | 892.5 ± 17.9 (c) | 103.7 ± 2.8 (c) |
|                     | Baked non-peeled cut      | 42.5 ± 1.9 (c)  | 30.7 ± 1.9 (a) | 125.1 ± 7.0 b    | - (a)          | 344.8 ± 18.9 (c) | 38.3 ± 2.0 (c)  |
|                     | Fried                     | 27.2 ± 0.9 (c)  | 12.9 ± 0.8 (a) | 77.1 ± 4.9 b     | - (a)          | 217.7 ± 11.6 ©   | 17.9 ± 1.0 (c)  |

**Table S3.** Anthocyanin profile in raw and cooked potatoes expressed as mg kg<sup>-1</sup> of DM (mean ± SD; n=3).

| Cultivar     |                           | Petunidin 3-O-rutinoside-5-glucoside | Pelargonidin 3-O-rutinoside | Pelargonidin 3-O-p-caffeoyl-rutinoside-5-O-glucoside | Pelargonidin 3-O-cis-p-coumaroyl-rutinoside-5-O-glucoside | Pelargonidin 3-O-p-coumaroyl-rutinoside-5-O-glucoside | Peonidin 3-O-p-coumaroyl-rutinoside-5-O-glucoside | Pelargonidin 3-O-p-feruloyl-rutinoside-5-O-glucoside | Peonidin 3-O-p-feruloyl-rutinoside-5-O-glucoside |
|--------------|---------------------------|--------------------------------------|-----------------------------|------------------------------------------------------|-----------------------------------------------------------|-------------------------------------------------------|---------------------------------------------------|------------------------------------------------------|--------------------------------------------------|
| Magenta Love | Fresh non-peeled          | < 0.5                                | < 0.5                       | 23.8 ± 1.1                                           | 26.7 ± 2.4                                                | 129.1 ± 9.0                                           | 30.0 ± 2.0                                        | 25.3 ± 1.0                                           | 20.6 ± 1.0                                       |
|              | Fresh peeled              | 54.0 ± 4.1                           | 19.4 ± 1.9                  | 39.0 ± 2.5                                           | 82.3 ± 6.5                                                | 573.6 ± 21.8                                          | 90.2 ± 6.8                                        | 42.6 ± 2.9                                           | 16.2 ± 0.6                                       |
|              | Boiled peeled             | 103.9 ± 5.9                          | 31.4 ± 2.8                  | 90.9 ± 7.6                                           | 125.3 ± 7.9                                               | 1255.0 ± 84.5                                         | 158.2 ± 10.0                                      | 92.0 ± 7.0                                           | 28.8 ± 1.0                                       |
|              | Microwaved non-peeled cut | 217.5 ± 9.1                          | <0.5                        | 151.0 ± 6.9                                          | 378.8 ± 12.7                                              | 2433.2 ± 71.1                                         | 449.6 ± 21.8                                      | 118.8 ± 7.3                                          | 40.3 ± 2.5                                       |
|              | Baked non-peeled cut      | 44.2 ± 3.6                           | 13.9 ± 1.2                  | 27.0 ± 2.8                                           | 107.6 ± 8.5                                               | 353.1 ± 22.6                                          | 114.5 ± 5.1                                       | 33.2 ± 1.9                                           | 15.7 ± 0.8                                       |
|              | Fried                     | 34.6 ± 2.0                           | 8.9 ± 1.1                   | 26.5 ± 3.1                                           | 63.0 ± 5.3                                                | 410.2 ± 18.9                                          | 68.8 ± 4.8                                        | 28.3 ± 1.8                                           | 9.1 ± 0.5                                        |

**Table S4.** Content of vitamin C in raw and cooked potatoes expressed as mg kg<sup>-1</sup> of DM (mean ± SD; n=3). Statistical analyses were made by comparing vitamin C content across varieties. Means denoted by the same letter did not differ significantly at P ≤ 0.05 according to Tukey's multiple range test.

| Variety             | Fresh<br>non-peeled | Fresh<br>peeled  | Boiled<br>peeled | Microwaved<br>non-peeled cut | Baked<br>non-peeled cut | Fried      |
|---------------------|---------------------|------------------|------------------|------------------------------|-------------------------|------------|
| Musica              | 597.8 ± 14.1 (a)    | 524.7 ± 22.7 (a) | 345.1 ± 22.3 (a) | 311.1 ± 9.9 (a)              | 299.0 ± 8.2             | 82.7 ± 2.4 |
| Magenta Love        | 382.9 ± 21.6 (b)    | 387.9 ± 8.0 (b)  | 291.9 ± 4.1 (b)  | 233.1 ± 4.7 (b)              | 167.1 ± 9.2             | 91.2 ± 3.5 |
| Violet Queen        | 304.3 ± 9.9 (c)     | 325.5 ± 8.5 (c)  | 258.8 ± 7.6 (c)  | 196.3 ± 5.5 (c)              | 101.9 ± 3.4             | 36.6 ± 3.7 |
| Blue star           | 268.3 ± 26.7 (d)    | 280.7 ± 9.9 (d)  | 219.3 ± 15.6 (d) | 158.3 ± 10.2 (d)             | 84.8 ± 4.0              | 32.4 ± 2.5 |
| Scano di Montiferro | 307.0 ± 12.6 (c)    | 316.9 ± 12.6 (c) | 204.5 ± 5.4 (d)  | 135.8 ± 7.2                  | 100.7 ± 2.0             | 33.1 ± 2.7 |

**Table S5.** Content of  $\alpha$ -chaconine in raw and cooked potatoes expressed as mg kg<sup>-1</sup> of DM (mean  $\pm$  SD; n=3). Statistical analyses were made by comparing  $\alpha$ -chaconine content across different varieties. Means denoted by the same letter did not differ significantly at  $P \leq 0.05$  according to Tukey's multiple range test.

| Variety             | Fresh non-peeled    | Fresh peeled       | Boiled peeled      | Microwaved non-peeled cut | Baked non-peeled cut | Fried              |
|---------------------|---------------------|--------------------|--------------------|---------------------------|----------------------|--------------------|
| Musica              | 141.3 $\pm$ 5.5 (a) | 9.2 $\pm$ 0.6 (a)  | 8.6 $\pm$ 0.5 (a)  | 99.3 $\pm$ 2.8 (a)        | 62.6 $\pm$ 2.4 (a)   | 6.6 $\pm$ 0.5 (a)  |
| Magenta Love        | 105.2 $\pm$ 5.2 (b) | 10.6 $\pm$ 0.5 (a) | 7.6 $\pm$ 0.6 (b)  | 84.7 $\pm$ 3.3 (b)        | 70.6 $\pm$ 3.7 (b)   | 8.3 $\pm$ 0.6 (a)  |
| Violet Queen        | 151.6 $\pm$ 3.4 (c) | 41.4 $\pm$ 2.5 (b) | 28.4 $\pm$ 1.9 (c) | 65.4 $\pm$ 4.9 (c)        | 55.0 $\pm$ 4.8 (c)   | 12.1 $\pm$ 1.6 (b) |
| Blue star           | 181.0 $\pm$ 3.9 (d) | 33.1 $\pm$ 2.4 (c) | 24.7 $\pm$ 0.9 (d) | 81.1 $\pm$ 3.1 (d)        | 69.1 $\pm$ 2.9 (ab)  | 15.6 $\pm$ 0.6 (c) |
| Scano di Montiferro | 166.3 $\pm$ 3.4 (e) | 38.2 $\pm$ 1.7 (d) | 42.6 $\pm$ 1.8 (d) | 80.8 $\pm$ 2.1 (d)        | 74.5 $\pm$ 3.9 (b)   | 12.3 $\pm$ 1.5 (b) |

**Table S6.** Content of  $\alpha$ -solanine in raw and cooked potatoes expressed as mg kg<sup>-1</sup> of DM (mean  $\pm$  SD; n=3). Statistical analyses were made by comparing of  $\alpha$ -solanine content across varieties. Means denoted by the same letter did not differ significantly at  $P \leq 0.05$  according to Tukey's multiple range test.

| Cultivar            | Fresh non-peeled   | Fresh peeled       | Boiled peeled      | Microwaved non-peeled cut | Baked non-peeled cut | Fried             |
|---------------------|--------------------|--------------------|--------------------|---------------------------|----------------------|-------------------|
| Musica              | 98.3 $\pm$ 2.0 (a) | 7.6 $\pm$ 0.4 (a)  | 7.1 $\pm$ 0.2 (a)  | 50.8 $\pm$ 2.0 (a)        | 53.0 $\pm$ 2.7 (a)   | 6.1 $\pm$ 0.4 (a) |
| Magenta Love        | 66.8 $\pm$ 3.0 (b) | 12.9 $\pm$ 0.6 (b) | 7.5 $\pm$ 0.6 (a)  | 30.0 $\pm$ 1.9 (b)        | 34.1 $\pm$ 1.2 (b)   | 3.8 $\pm$ 0.4 (b) |
| Violet Queen        | 69.9 $\pm$ 3.1 (b) | 27.6 $\pm$ 2.7 (c) | 18.8 $\pm$ 1.4 (b) | 23.4 $\pm$ 2.0 (c)        | 25.1 $\pm$ 1.1 (c)   | 5.7 $\pm$ 0.4 (a) |
| Blue star           | 92.9 $\pm$ 2.5 (c) | 29.5 $\pm$ 0.8 (c) | 22.0 $\pm$ 1.6 (c) | 34.6 $\pm$ 0.7 (b)        | 30.1 $\pm$ 1.5 (b)   | 2.7 $\pm$ 0.4 (c) |
| Scano di Montiferro | 51.1 $\pm$ 3.7 (d) | 19.2 $\pm$ 1.5 (d) | 16.5 $\pm$ 1.1 (d) | 31.0 $\pm$ 1.4 (d)        | 33.3 $\pm$ 1.5 (d)   | 6.9 $\pm$ 0.6 (a) |
