# Supplementary material for: Biochemical Characterization and Effects of Cooking Methods on Main Phytochemicals of Red and Purple Potato Tubers, a Natural Functional Food
Source: MDPI journal article supplement (doi:10.3390/foods11030384), 2022-01-28
Supplement: s1 [file s1]

Figure S1. General structure of anthocyanins in potato samples tested.

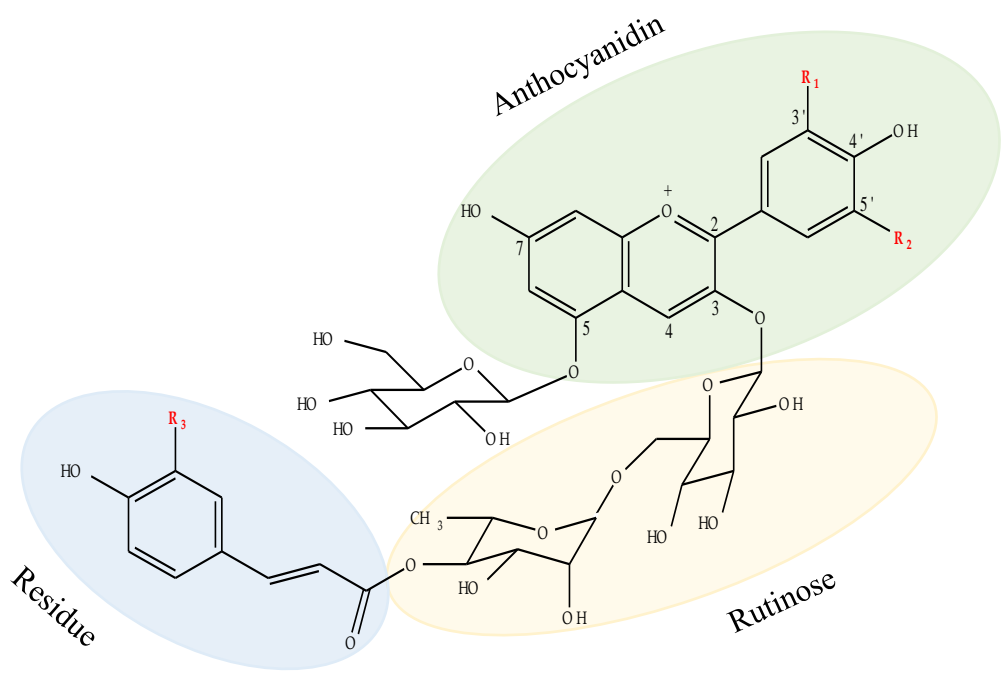

| <b>R<sub>1</sub></b> | <b>R<sub>2</sub></b> | <b>Anthocyanidin</b> |
|----------------------|----------------------|----------------------|
| H                    | H                    | Pelargonidin         |
| OCH <sub>3</sub>     | H                    | Peonidin             |
| OCH <sub>3</sub>     | OH                   | Petunidin            |
| OCH <sub>3</sub>     | OCH <sub>3</sub>     | Malvadin             |

| <b>R<sub>3</sub></b> | <b>Residue</b> |
|----------------------|----------------|
| H                    | p-Coumaroyl    |
| OH                   | Caffeoyl       |
| OCH <sub>3</sub>     | Feruloyl       |
